# Supplementary material
Source: publisher figshare collection journal article supplement (https://geolsoc.figshare.com/ndownloader/files/10865795)
Supplement: Supplementary file 1 [file 10865795]

# Warren et al, Supplementary Information

## NIGL analytical details

| <b>Laboratory &amp; Sample Preparation</b> |                                                                                                               |
|--------------------------------------------|---------------------------------------------------------------------------------------------------------------|
| Laboratory name                            | NERC Isotope Geosciences Laboratory                                                                           |
| Sample type/mineral                        | Monazite                                                                                                      |
| Sample preparation                         | In-situ on polished thin sections                                                                             |
| Imaging                                    | X-ray mapping using Electron-Probe MicroAnalysis (EPMA)-Open University, U.K.                                 |
| <b>Laser ablation system</b>               |                                                                                                               |
| Make, Model & type                         | ESI/New Wave Research, UP193SS                                                                                |
| Ablation cell & volume                     | NWR two-volume 'large format cell' with low effective volume (ca. 3-4cm <sup>3</sup> ), washout time ca.<1sec |
| Laser wavelength (nm)                      | 193nm                                                                                                         |
| Pulse width (ns)                           | 3-4ns                                                                                                         |
| Fluence (J.cm <sup>-2</sup> )              | ~2.5 J.cm <sup>-2</sup>                                                                                       |
| Repetition rate (Hz)                       | 5Hz                                                                                                           |
| Ablation duration (secs)                   | 30secs                                                                                                        |
| Ablation pit depth / ablation rate         | ~15µm pit depth, measured using an optical microscope                                                         |
| Spot size (mm)                             | 15 – 20µm                                                                                                     |
| Sampling mode / pattern                    | Static spot ablation                                                                                          |
| Carrier gas                                | 100% He, Ar make-up gas combined ca.50% along sample line.                                                    |
| Cell carrier gas flow (l/min)              | 0.7l/min                                                                                                      |
| <b>ICP-MS Instrument</b>                   |                                                                                                               |
| Make, Model & type                         | Nu Instruments Attom SC-SF-ICP-MS                                                                             |
| Sample introduction                        | Free air aspiration of desolvator                                                                             |
| RF power (W)                               | 1300W                                                                                                         |
| Make-up gas flow (l/min)                   | 0.8l/min Ar                                                                                                   |
| Detection system                           | Discrete dynode MassCom ion counter                                                                           |
| Masses measured                            | 202, 204, 206, 207, 208, 232, 235                                                                             |
| Integration time per peak                  | 200µs (202, 204, 206), 300µs (232, 208), 3000µs (207, 235)<br>40 sweeps per integration                       |
| Total integration time per reading (secs)  | 0.30 seconds                                                                                                  |
| Sensitivity / Efficiency (%<br>element)    | ~0.27% for Uranium                                                                                            |
| IC Dead time (ns)                          | 15ns                                                                                                          |
| <b>Data Processing</b>                     |                                                                                                               |

|                                                    |                                                                                                                                                                                                                                                                                                           |
|----------------------------------------------------|-----------------------------------------------------------------------------------------------------------------------------------------------------------------------------------------------------------------------------------------------------------------------------------------------------------|
| Gas blank                                          | 60 second on-peak zero subtracted                                                                                                                                                                                                                                                                         |
| Calibration strategy                               | Manangotry, Moacyr (Palin et al. 2013). Manangotry used as primary reference material for normalization, and others used as check on accuracy.                                                                                                                                                            |
| Reference Material info                            | Stern 512.1±1.9 Ma (2σ) ID-TIMS $^{238}\text{U}$ - $^{206}\text{Pb}$ age (Palin et al. 2013)<br>Manangotry 559±1 Ma (2σ) ID-TIMS $^{238}\text{U}$ - $^{206}\text{Pb}$ age (Palin et al. 2013)<br>Moacyr 515.6±1.4 Ma ID-TIMS $^{238}\text{U}$ - $^{206}\text{Pb}$ age (Palin et al. 2013)                 |
| Data processing package used / Correction for LIEF | Nu Instruments TRA acquisition software, in-house spreadsheet data processing                                                                                                                                                                                                                             |
| Mass discrimination                                | $^{207}\text{Pb}/^{206}\text{Pb}$ , $^{206}\text{Pb}/^{238}\text{U}$ and $^{208}\text{Pb}/^{232}\text{Th}$ normalised to reference material                                                                                                                                                               |
| Common-Pb correction, composition and uncertainty  | Stacey & Kramers (1975) model composition, based on f206c, using estimated age derived from $^{206}\text{Pb}/^{238}\text{U}$ and f208c using measured $^{208}\text{Pb}/^{206}\text{Pb}$ .                                                                                                                 |
| Uncertainty level & propagation                    | Ages in the data table are quoted at 2sigma absolute, propagation is by quadratic addition. Excess variance of reference material is propagated.                                                                                                                                                          |
| Quality control / Validation                       | <i><math>^{206}\text{Pb}/^{238}\text{U}</math> ages:</i><br>Stern – 514.0±1.4 Ma (MSWD = 1.15; n=117)<br>Moacyr – 516.0±1.7 Ma (MSWD = 1.07; n=68)<br><i><math>^{208}\text{Pb}/^{232}\text{Th}</math> ages:</i><br>Stern – 507.1±1.5 Ma (MSWD = 1.04; n=117)<br>Moacyr – 512.2±2.1 Ma (MSWD = 1.14; n=68) |
| <b>Other information</b>                           |                                                                                                                                                                                                                                                                                                           |
